# Supplementary material for: Low Gut Ruminococcaceae Levels are Associated with Occurrence of Antibiotic-associated Diarrhea
Source: bioRxiv or medRxiv preprint supplement (doi:10.1101/2021.09.23.21263551), 2021-09-24
Supplement: Supplementary file [file media-1.pdf]

1 Supplementary Appendix  
2  
3 Low Gut Ruminococcaceae Levels are Associated with Occurrence of Antibiotic-associated  
4 Diarrhea  
5  
6 **Table S1. Demographic Characteristics of Healthy Volunteers. Subject 18, 28, and 32 did**  
7 **not meet the requirements to participate in the study during screening and were not**  
8 **dosed with antibiotics. Individuals with AAD are highlighted in yellow. ....2**  
9 **Table S2. Demographic Characteristics of Individuals Between the AAD And Non-AAD**  
10 **Groups. Two-tailed Mann-Whitney tests were performed to test for significant differences**  
11 **between the AAD and non-AAD groups. ....3**  
12 **Table S3. Frequency and Bristol Stool Scale type. Faeces samples collection log book from**  
13 **20 Aug 2019 to 20 Jan 2020. Subject 18, 28 and 32 failed during screening and were not**  
14 **dosed with antibiotics. Individuals with AAD are highlighted in yellow. Gray shaded boxes**  
15 **indicate that donors could not produce the stool samples or the stool samples were not**  
16 **collected. A total of 197 faeces samples were collected. ....4**  
17 **Table S4. Primer-probe sets used in this study .....6**  
18 **Table S5. gBlocks Gene Fragments sequences for Faecalibacterium prausnitzii, 16S rRNA, C.**  
19 **difficile TcdA and TcdB gene.....7**  
20 **Figure S1. Enterobacteriaceae bloom (EB) were more common in the AAD group with a**  
21 **much higher magnitude.....9**  
22 **Figure S2. PCoA of baseline samples based on the ASV level bray-curtis dissimilarity. ....10**  
23  
24

25 **Table S1. Demographic Characteristics of Healthy Volunteers.** Subject 18, 28, and 32 did not meet the  
 26 requirements to participate in the study during screening and were not dosed with antibiotics. Individuals with  
 27 AAD are highlighted in yellow.

| ID | Age range | Sex    | Ethnicity  | Height (m) | Weight (kg) | BMI <sup>a</sup> | Total doses of Amoxicillin-Clavulanate |
|----|-----------|--------|------------|------------|-------------|------------------|----------------------------------------|
| 1  | 36-40     | Female | Chinese    | 1.61       | 68          | 26.4             | 6                                      |
| 2  | 26-30     | Male   | Malay      | 1.68       | 71          | 25.0             | 4 <sup>c</sup>                         |
| 3  | 31-35     | Female | Chinese    | 1.61       | 58          | 22.2             | 6                                      |
| 4  | 36-40     | Male   | Chinese    | 1.79       | 68          | 21.1             | 6                                      |
| 5  | 26-30     | Male   | Chinese    | 1.77       | 96          | 30.5             | 6                                      |
| 6  | 36-40     | Male   | Chinese    | 1.77       | 82          | 26.1             | 6                                      |
| 7  | 36-40     | Female | Chinese    | 1.71       | 73          | 24.9             | 6                                      |
| 8  | 26-30     | Female | Chinese    | 1.63       | 69          | 25.8             | 6                                      |
| 9  | 21-25     | Female | Chinese    | 1.62       | 52          | 20.0             | 6                                      |
| 10 | 21-25     | Male   | Chinese    | 1.67       | 67          | 24.1             | 6                                      |
| 11 | 21-25     | Female | Chinese    | 1.65       | 52          | 19.1             | 6                                      |
| 12 | 26-30     | Female | Chinese    | 1.56       | 58          | 23.8             | 6                                      |
| 13 | 31-35     | Female | Chinese    | 1.65       | 64          | 23.4             | 6                                      |
| 14 | 36-40     | Female | Chinese    | 1.58       | 61          | 24.4             | 6                                      |
| 15 | 21-25     | Female | Chinese    | 1.63       | 48          | 18.1             | 1 <sup>c</sup>                         |
| 16 | 26-30     | Male   | Chinese    | 1.6        | 74          | 28.9             | 5 <sup>c</sup>                         |
| 17 | 36-40     | Female | Chinese    | 1.59       | 74          | 29.4             | 6                                      |
| 19 | 21-25     | Male   | Chinese    | 1.8        | 88          | 27.2             | 6                                      |
| 20 | 36-40     | Female | Chinese    | 1.58       | 57          | 22.7             | 6                                      |
| 21 | 31-35     | Male   | Malay      | 1.69       | 68          | 23.9             | 6                                      |
| 22 | 21-25     | Female | Chinese    | 1.60       | 74          | 28.9             | 6                                      |
| 23 | 31-35     | Male   | Chinese    | 1.78       | 108         | 34.1             | 6                                      |
| 24 | 26-30     | Male   | Chinese    | 1.71       | 73          | 24.8             | 3 <sup>c</sup>                         |
| 25 | 21-25     | Male   | Chinese    | 1.53       | 50          | 21.7             | 1 <sup>b</sup>                         |
| 26 | 21-25     | Male   | Chinese    | 1.75       | 77          | 25.0             | 6                                      |
| 27 | 21-25     | Male   | Chinese    | 1.72       | 69          | 23.3             | 6                                      |
| 29 | 21-25     | Male   | Chinese    | 1.77       | 70          | 22.4             | 6                                      |
| 30 | 36-40     | Male   | Chinese    | 1.76       | 78          | 25.3             | 6                                      |
| 31 | 26-30     | Female | Indian     | 1.64       | 73          | 27.1             | 6                                      |
| 33 | 26-30     | Female | Vietnamese | 1.51       | 52          | 22.9             | 6                                      |

28  
 29 <sup>b</sup>Subject 25 developed severe vomiting after a single dose of amoxicillin-clavulanate, resulting in discontinuation  
 30 of antibiotics on day 1.

31 <sup>c</sup>Subject 2, 15, 16 and 24 experienced 3 or more episodes of watery stool in a 24-hour period (Table S2), resulting  
 32 in discontinuation of antibiotics.  
 33

34 **Table S2. Demographic Characteristics of Individuals Between the AAD And Non-AAD Groups.** Two-tailed  
 35 Mann-Whitney tests were performed to test for significant differences between the AAD and non-AAD groups.

|        | AAD individuals (n=13) | non-AAD individuals (n=17) | p value |
|--------|------------------------|----------------------------|---------|
| Sex    | --                     | --                         | 0.46    |
| Female | 5(38%)                 | 10(59%)                    |         |
| Male   | 8(62%)                 | 7(41%)                     |         |
| Age    | 30(26-37)              | 28(24-34)                  | 0.34    |
| BMI    | 24.86(23.91-26.40)     | 23.75(22.19-25.84)         | 0.39    |
| Height | 1.68(1.63-1.71)        | 1.63(1.59-1.75)            | 0.31    |
| Weight | 70.65(67.10-74.00)     | 68.65(57.8-73.95)          | 0.46    |

Data are n/N (%) for proportional data and median (IQR) for continuous data, unless specified otherwise.

36

**Table S3. Frequency and Bristol Stool Scale type.** Faeces samples collection log book from 20 Aug 2019 to 20 Jan 2020. Subject 18, 28 and 32 failed during screening and were not dosed with antibiotics. Individuals with AAD are highlighted in yellow. Gray shaded boxes indicate that donors could not produce the stool samples or the stool samples were not collected. A total of 197 faeces samples were collected.

| ID | Screening |           | Day 0 |           | Day 1 |                | Day 2 |                | Day 3 |                | Day 7 |           | Day 14 +/- 2 |           | Day 28 +/- 2 |           |
|----|-----------|-----------|-------|-----------|-------|----------------|-------|----------------|-------|----------------|-------|-----------|--------------|-----------|--------------|-----------|
|    | BS        | Frequency | BS    | Frequency | BS    | Frequency      | BS    | Frequency      | BS    | Frequency      | BS    | Frequency | BS           | Frequency | BS           | Frequency |
| 1  | 4         | 2         | 4     | 2         | 5     | 3              | 6     | 2              | 6     | 2              | 4     | 2         | 4            | 1         | 4            | 2         |
| 2  | 3         | 3         | 3     | 3         | 3     | 4              | 5     | 5 <sup>a</sup> | 7     | 8              | NA    | NA        | 3            | 4         | 4            | 3         |
| 3  | 4         | 1         | 4     | 1         | 4     | 1              | 4     | 1              | 4     | 2              | 4     | 2         | 4            | 1         | 4            | 2         |
| 4  | 3         | 1         | 3     | 1         | 3     | 1              | 3     | 1              | 4     | 1              | 3     | 1         | 4            | 1         | NA           | 0         |
| 5  | 5         | 1         | 5     | 3         | 7     | 2              | 5     | 1              | 6     | 2              | 4     | 1         | 4            | 1         | 4            | 3         |
| 6  | 4         | 2         | 5     | 2         | 6     | 2              | 6     | 1              | 6     | 1              | 4     | 1         | 4            | 1         | 1            | 1         |
| 7  | 4         | 1         | 4     | 1         | 6     | 2              | 6     | 2              | 5     | 1              | 4     | 1         | 4            | 2         | 2            | 1         |
| 8  | 4         | 2         | 4     | 1         | 5     | 1              | 5     | 1              | 5     | 1              | 4     | 1         | 3            | 2         | 4            | 2         |
| 9  | 4         | 1         | 4     | 1         | 4     | 1              | 5     | 1              | 5     | 2              | 4     | 1         | 3            | 1         | 4            | 2         |
| 10 | 4         | 2         | 4     | 1         | 4     | 1              | 4     | 1              | 7     | 4              | NA    | NA        | NA           | NA        | 4            | 4         |
| 11 | 3         | 1         | 4     | 1         | 4     | 1              | 4     | 2              | 4     | 1              | 2     | 1         | 3            | 1         | 4            | 1         |
| 12 | 4         | 1         | 4     | 1         | NA    | NA             | NA    | NA             | 4     | 1              | 4     | 1         | 4            | 1         | 4            | 1         |
| 13 | 5         | 1         | 6     | 1         | 6     | 1              | 5     | 1              | 4     | 2              | 6     | 2         | 4            | 1         | 6            | 2         |
| 14 | 3         | 1         | 4     | 1         | 4     | 1              | 4     | 2              | 4     | 1              | 4     | 2         | 4            | 2         | 3            | 1         |
| 15 | 3         | 1         | 3     | 1         | 7     | 3 <sup>b</sup> | 6     | 3              | 4     | 1              | 5     | 1         | 4            | 2         | 3            | 1         |
| 16 | 4         | 1         | 6     | 1         | 6     | 1              | 6     | 2              | 7     | 5 <sup>c</sup> | 6     | 1         | 6            | 2         | 6            | 1         |
| 17 | 4         | 1         | 4     | 2         | 4     | 1              | 4     | 1              | 4     | 1              | 4     | 1         | 4            | 1         | 4            | 1         |
| 19 | 6         | 1         | 3     | 2         | 7     | 2              | 2     | 1              | 3     | 1              | 2     | 1         | 4            | 1         | 3            | 1         |
| 20 | 3         | 1         | 4     | 1         | 6     | 1              | 6     | 1              | 3     | 1              | 3     | 1         | 3            | 1         | 4            | 2         |
| 21 | 2         | 1         | 4     | 1         | 4     | 2              | 6     | 1              | 3     | 1              | 4     | 1         | 3            | 2         | 6            | 1         |
| 22 | 5         | 1         | 6     | 1         | 4     | 1              | 4     | 1              | 4     | 1              | 4     | 1         | 4            | 1         | 4            | 2         |
| 23 | 4         | 1         | 3     | 2         | 4     | 1              | 4     | 1              | 4     | 1              | 4     | 2         | 4            | 1         | 4            | 2         |
| 24 | 5         | 2         | 5     | 1         | 7     | 3 <sup>d</sup> | 4     | 2              | 1     | 2              | 4     | 2         | 4            | 1         | 4            | 2         |

|    |   |   |   |   |   |   |   |   |   |   |   |   |    |    |    |    |
|----|---|---|---|---|---|---|---|---|---|---|---|---|----|----|----|----|
| 25 | 3 | 1 | 3 | 1 | 4 | 1 | 5 | 1 | 4 | 1 | 5 | 1 | 4  | 1  | 4  | 1  |
| 26 | 4 | 1 | 3 | 2 | 3 | 1 | 4 | 2 | 4 | 2 | 4 | 2 | 4  | 2  | 4  | 2  |
| 27 | 4 | 1 | 4 | 2 | 5 | 1 | 5 | 3 | 5 | 1 | 4 | 1 | 4  | 2  | 4  | 1  |
| 29 | 4 | 1 | 4 | 2 | 4 | 2 | 4 | 3 | 4 | 2 | 5 | 2 | 4  | 2  | 4  | 3  |
| 30 | 4 | 1 | 4 | 2 | 2 | 1 | 2 | 2 | 2 | 1 | 5 | 4 | 4  | 1  | 4  | 1  |
| 31 | 4 | 3 | 4 | 4 | 4 | 2 | 4 | 2 | 4 | 2 | 4 | 2 | 5  | 1  | 4  | 2  |
| 33 | 2 | 1 | 1 | 2 | 2 | 1 | 3 | 1 | 2 | 1 | 1 | 1 | NA | NA | NA | NA |

<sup>a</sup>Subject 2 experienced 5 episodes of watery stool in a 24-hour period, resulting in discontinuation of antibiotics on day 2, with the total doses of amoxicillin-clavulanate as 4.

<sup>b</sup>Subject 15 experienced 3 episodes of watery stool in a 24-hour period, resulting in discontinuation of antibiotics on day 1, with the total doses of amoxicillin-clavulanate as 1.

<sup>c</sup>Subject 16 experienced 5 episodes of watery stool in a 24-hour period, resulting in discontinuation of antibiotics on day 3, with the total doses of amoxicillin-clavulanate as 5.

<sup>d</sup>Subject 24 experienced 3 episodes of watery stool in a 24-hour period, resulting in discontinuation of antibiotics on day 1, with the total doses of amoxicillin-clavulanate as 3.

**Table S4. Primer-probe sets used in this study**

| Name               | Sequences                                    | References |
|--------------------|----------------------------------------------|------------|
| 16S_V4_515F primer | GTGCCAGCMGCCGCGGTAA                          | (1)        |
| 16S_V4_806R primer | GGACTACHVGGGTWTCTAAT                         |            |
| F. prau_FP         | GATGGCCTCGCGTCCGATTAG                        | (2)        |
| F. prau_RP         | CCGAAGACCTTCTCCTCC                           |            |
| 16S_FP             | ACTCCTACGGGAGGCAGCAG                         | (3)        |
| 16S_RP             | ATTACCGCGGCTGCTGG                            |            |
| TcdA_FP            | CAGTCGGATTGCAAGTAATTGACAAT                   | (4)        |
| TcdA_RP            | AGTAGTATCTACTACCATTAACAGTCTGC                |            |
| TcdA_Probe         | /56-FAM/TTGAGATGATAGCAGTGTCAGGATTG/36-TAMSp/ |            |
| TcdB_FP            | TACAAACAGGTGTATTTAGTACAGAAGATGGA             |            |
| TcdB_RP            | CACCTATTTGATTTAGMCCTTTAAAAGC                 |            |
| TcdB_Probe         | /56-FAM/TTTKCCAGTAAAATCAATTGCTTC/36-TAMSp/   |            |

**Table S5. gBlocks Gene Fragments sequences for *Faecalibacterium prausnitzii*, 16S rRNA, *C. difficile* TcdA and TcdB gene.**

| gBlocks Gene Fragments                                                                       | Sequences                                                                                                                                                                                                                                                                                                                                                                                                                                                                              |
|----------------------------------------------------------------------------------------------|----------------------------------------------------------------------------------------------------------------------------------------------------------------------------------------------------------------------------------------------------------------------------------------------------------------------------------------------------------------------------------------------------------------------------------------------------------------------------------------|
| gBlocks Gene Fragments for <i>Faecalibacterium prausnitzii</i> and 16S rRNA positive control | GGTAGAGGGAAAAGGAGCAATCCGCTTTGAGATGGCCTCGCGTCCGATTAGCTAGTTGGTGA<br>GGTAATGGCCCACCAAGGCGACGATCGGTAGCCGGACTGAGAGGTTGAACGGCCACATTGG<br>GACTGAGACACGGCCCAGACTCCTACGGGAGGCAGCAGTGGGGAATATTGCACAATGGGGG<br>AAACCCTGATGCAGCGACGCCGCTGGAGGAAGAAGGTCTTCGGATTGTAAACTCCTGTTGT<br>TGAGGAAGATAATGACGGTACTCAACAAGGAAGTGACGGCTAACTACGTGCCAGCAGCCGC<br>GGTAATACGTAGGTCACAAGCGTTGTCCGGAATTAC                                                                                                             |
| gBlocks Gene Fragments for <i>C. difficile</i> TcdA positive control                         | GGTAGAGGGAAAAGGAGCAATCCGCTTTGAGATGGCCTCGCGTCCGATTAGCTAGTTGGTGA<br>GGTAATGGCCCACCAAGGCGACGATCGGTAGCCGGACTGAGAGGTTGAACGGCCACATTGG<br>GACTGAGACACGGCCCAGACTCCTACGGGAGGCAGCAGTGGGGAATATTGCACAATGGGGG<br>AAACCCTGATGCAGCGACGCCGCTGGAGGAAGAAGGTCTTCGGATTGTAAACTCCTGTTGT<br>TGAGGAAGATAATGACGGTACTCAACAAGGAAGTGACGGCTAACTACGTGCCAGCAGCCGC<br>GGTAATACGTAGGTCACAAGCGTTGTCCGGAATTAC                                                                                                             |
| gBlocks Gene Fragments for <i>C. difficile</i> TcdB positive control                         | TACACCCCTGCGGCAACGTTGAAGCTCCTGGATTACACTGGCTGGATCTAAGCCGTGACACC<br>CGTCATACTCCATAACCGTCTGTAACCTCACGGCTTGTCTGGACTGGATTGCCATTCTCTCAG<br>AGTATTATGCAGGCCGGCGTACGGGTCCCATATAAACCTGTCATAGCTTACCTGACTCTACTT<br>GGAAATGTGGCTTACAAACAGGTGTATTTAGTACAGAAGATGGATTTAAATATTTTGCCCA<br>GCTAATAACACTTGATGAAAACCTAGAAGGAGAAGCAATTGATTTTACTGGAAAATTAATTAT<br>TGACGAAAATATTTATTTTATTTGATGATAATTATAGAGGAGCTGTAGAATGGAAAAGAATTAG<br>ATGGTGAAAATGCACTATTTTAGCCAGAAAACAGGTAAAGCTTTTAAAGTCTAAATCAAATA<br>GGTG |

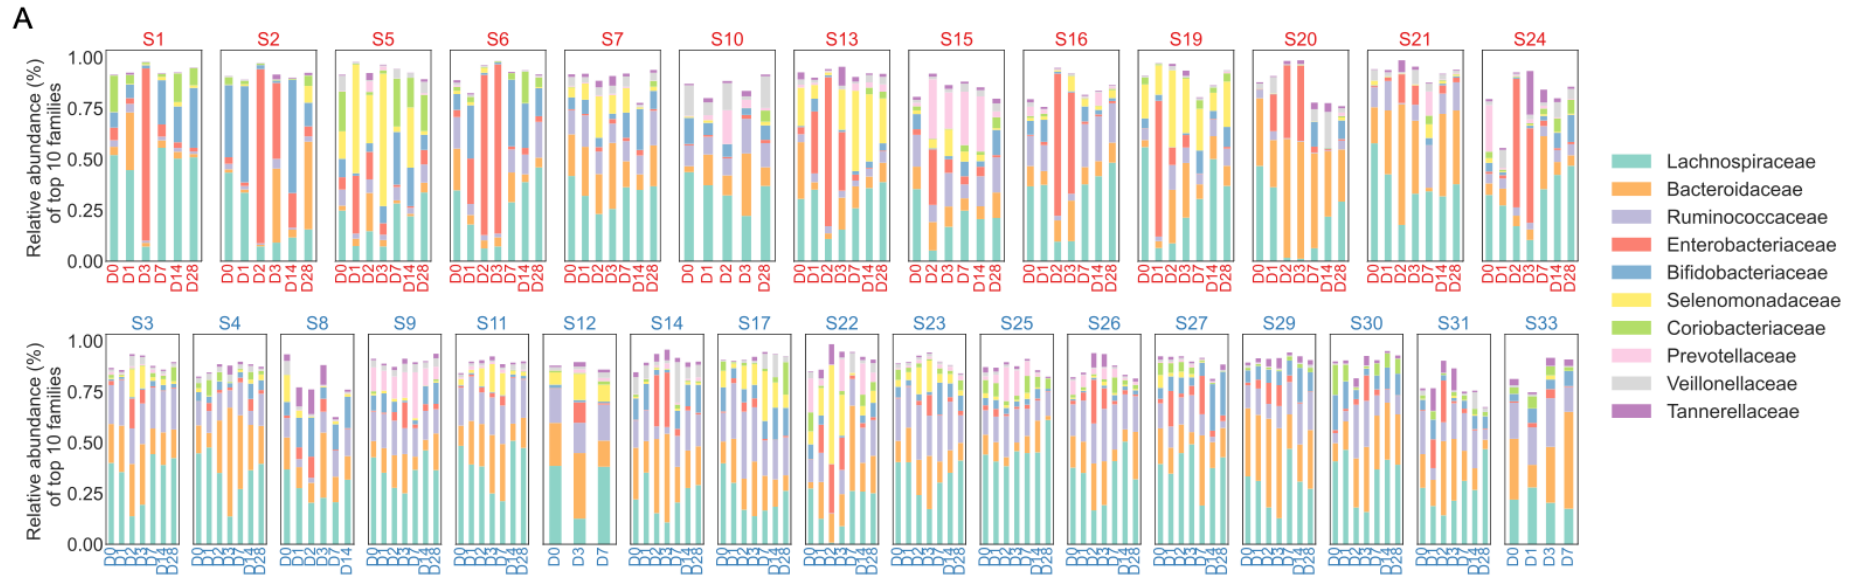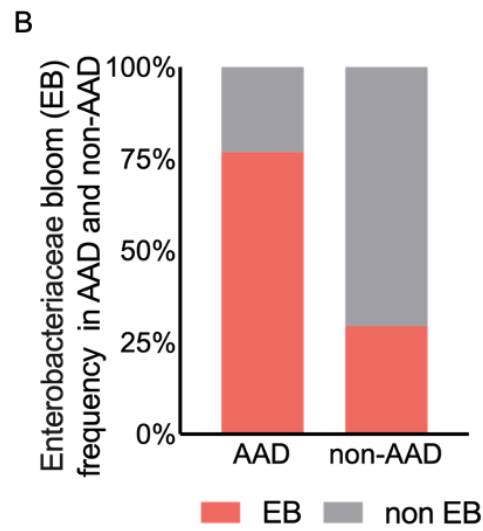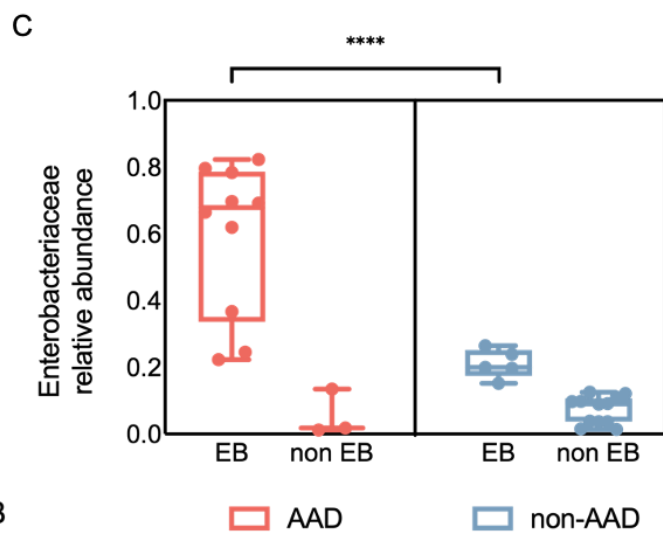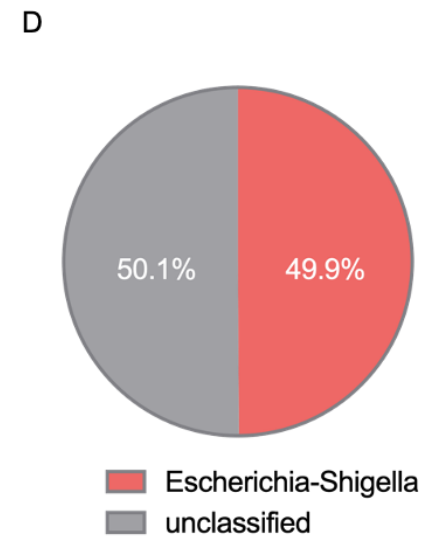



**Figure S1. Enterobacteriaceae bloom (EB) were more common in the AAD group with a much higher magnitude.**

Related to Figure 2. (A) A panel list of the 10 most abundant families in individuals in the AAD (top panel) and non-AAD groups (bottom panel). (B) Enterobacteriaceae blooms (EB) were observed more frequently in the AAD group compared to the non-AAD group (76.9% vs 29.4%). As the increase in Enterobacteriaceae varies between days 1-3 across different individuals, we defined Enterobacteriaceae blooms as having the maximum of Enterobacteriaceae abundance across days 1-3 in each individual being larger than the median(max(days 1-3)-baseline). (C) For all the individuals who experienced EB, the relative abundance of Enterobacteriaceae is higher in the individuals with AAD compared to the individuals with non-AAD (mean 0.59 vs 0.21, FDR corrected  $p < 0.0001$ ). (D) Pie charts of the most abundant genera in Enterobacteriaceae across days 1-3. Within the Enterobacteriaceae family, we observed a higher abundance of Escherichia-Shigella (49.9%) at the genus level.

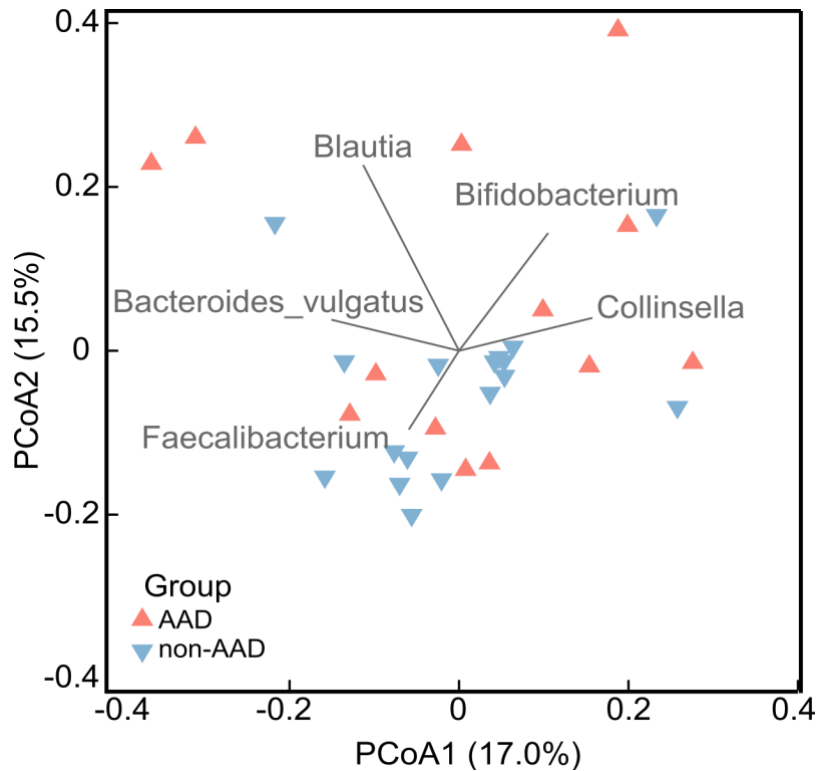

**Figure S2. PCoA of baseline samples based on the ASV level bray-curtis dissimilarity.**

Related to Figure 3. Display is based on sample scores on the primary axis (PCoA1, 17.0% variance explained) and secondary axis (PCoA2, 15.5% variance explained). Vector loading plots at the ASV level indicate that ASV assigned to *Faecalibacterium* points to the non-AAD group while many unified features (e.g., ASVs assigned to *Blautia*, *Bifidobacterium*, *Collinsella*, *Bacteroides\_vulgatus*) point to the AAD groups (multiple linear correlation with the threshold setting as 0.3).

## Reference

1. Caporaso JG et al. Global patterns of 16S rRNA diversity at a depth of millions of sequences per sample. *Proc. Natl. Acad. Sci. U. S. A.* 2011;108(SUPPL. 1). doi:10.1073/pnas.1000080107
2. Carroll IM, Ringel-Kulka T, Siddle JP, Ringel Y. Alterations in composition and diversity of the intestinal microbiota in patients with diarrhea-predominant irritable bowel syndrome. *Neurogastroenterol. Motil.* 2012;24(6). doi:10.1111/j.1365-2982.2012.01891.x
3. Van Hul M et al. From correlation to causality: the case of Subdoligranulum. *Gut Microbes* 2020;12(1):1–13.
4. Kubota H et al. Development of TaqMan-based quantitative PCR for sensitive and selective detection of toxigenic clostridium difficile in human stools. *PLoS One* 2014;9(10). doi:10.1371/journal.pone.0111684
